# Supplementary material
Source: Research Square preprint supplement (doi:10.21203/rs.3.rs-9601599/v1)
Supplement: Supplementary file 1 [file 0f9598d40377a7daaa98e395.docx]

| **CPRS-R-Lj** | **CEBQa** | **FR** | **EOEc** | **EFd** | **DDe** | **CEBQ-approach** | **SRf** | **SEg** | **EUEh** | **FFi** | **CEBQ-avoid** |
| --- | --- | --- | --- | --- | --- | --- | --- | --- | --- | --- | --- |
| “Oppositional” | **r** | 0.232 | 0.094 | -0.032 | 0.070 | 0.076 | 0.204 | 0.291 | -0.091 | -0.017 | 0.126 |
| “Inattention” | **r** | 0.097 | 0.124 | -0.175 | 0.035 | -0.022 | 0.256 | 0.216 | 0.010 | -0.022 | 0.084 |
| “Hyperactivity” | **r** | 0.112 | 0.107 | 0.026 | 0.164 | 0.104 | 0.292 | 0.159 | 0.118 | 0.015 | 0.182 |
| “Anxious/Shy” | **r** | **0.297*** | 0.269 | 0.150 | 0.143 | 0.289 | 0.208 | 0.056 | 0.218 | 0.238 | 0.210 |
| “Perfectionism” | **r** | 0.003 | 0.092 | -0.185 | **0.384*** | 0.054 | 0.107 | 0.184 | -0.001- | 0.098 | 0.095 |
| “Social problems” | **r** | **0.322*** | 0.159 | 0.083 | 0.203 | 0.265 | 0.161 | 0.124 | 0.109 | 0.021 | 0.080 |
| “Psychosomatic” | **r** | 0.009 | 0.149 | -0.043 | -0.015 | 0.003 | 0.008 | 0.075 | -0.026 | -0.038 | -0.041 |
| “Conners’ ADHD Index” | **r** | 0.041 | 0.123 | -0.087 | -0.003 | -0.006 | **0.347*** | 0.263 | 0.064 | -0.056 | 0.184 |
| “Conners’ Global Index Impulsive” | **r** | 0.255 | 0.235 | 0.035 | 0.102 | 0.164 | **0.347*** | **0.323*** | 0.125 | 0.052 | 0.254 |
| “Conners’ Global index Emotional Lability” | **r** | 0.176 | 0.236 | -0.008 | 0.100 | 0.141 | 0.290 | 0.079 | 0.138 | 0.163 | 0.169 |
| “Conners’ Global Index Total” | **r** | 0.280 | **0.299*** | 0.060 | 0.101 | 0.200 | **0.368*** | 0.285 | 0.170 | 0.130 | 0.277 |
| “DSM IV Inattentive” | **r** | 0.124 | 0.111 | -0.022 | -0.168 | -0.004 | 0.152 | 0.071 | -0.009 | -0.103 | 0.019 |
| “DSM IV Hyperactive” | **r** | 0.096 | 0.079 | -0.038 | 0.209 | 0.083 | **0.317*** | 0.203 | 0.160 | -0.060 | 0.185 |
| “DSM IV Total” | **r** | 0.145 | 0.163 | -0.010 | 0.057 | 0.079 | 0.245 | 0.119 | 0.064 | -0.097 | 0.097 |

**Supplementary Table 1** Correlation between mean scores of the CEBQa and the CPRS-R-Lj in children with ADHD

*= statistically significant correlation, r= correlation coefficient, CEBQa = “child eating behavior questionnaire”, FRb= “food responsiveness”, EOEc= “emotional overeating”, EFd= “enjoyment of food”, DDe= “desire to drink”, SRf= “satiety responsiveness”, SEg= “slowness of eating”, , EUEh= “emotional undereating” , FFi= “food fussiness”, , CPRS-R-Lj= the “Conners’ parent rating scale- revised long version”

*P value for the correlation between “***food responsiveness***” and each of “anxious/ shy” and “social problems” subscales is 0.048 and 0.031 respectively. P values for the correlation between “***emotional overeating***” and “Conners’ Global Index” is 0.046 and for the correlation between “***desire to drink***” and “perfectionism” is 0.009. P value for the correlation between “***satiety responsiveness***” and each of “Conners’ ADHD index”, “Conners’ Global Index Total”, “Conners’ Global Impulsive Index”, and “DSM-IV Hyperactive” is 0.020, 0.013, 0.019, 0.034. P value for the correlation between “slowness of eating” and “Conner’s Global Index Impulsive” is 0.030.
